# Supplementary material for: Functional Implications of Human-Specific Changes in Great Ape microRNAs
Source: PubMed Central journal article supplement (PMC4841587; doi:10.1371/journal.pone.0154194), 2016-04-22
Supplement: pone.0154194.s002.pdf [file pone.0154194.s002.pdf]

**S1 Table. Number of individuals in each great ape population used in this study.** Information based on Prado-Martinez et al. [1].

| Common name | Species name                          | Number of individuals |
|-------------|---------------------------------------|-----------------------|
| Human       | <i>Homo sapiens</i>                   | 9                     |
| Chimpanzee  | <i>Pan troglodytes verus</i>          | 4                     |
|             | <i>Pan troglodytes schweinfurthii</i> | 6                     |
|             | <i>Pan troglodytes troglodytes</i>    | 4                     |
|             | <i>Pan troglodytes ellioti</i>        | 10                    |
| Bonobo      | <i>Pan paniscus</i>                   | 13                    |
| Gorilla     | <i>Gorilla gorilla gorilla</i>        | 23                    |
|             | <i>Gorilla beringei graueri</i>       | 3                     |
| Orangutan   | <i>Pongo abelii</i>                   | 5                     |
|             | <i>Pongo pygmaeus</i>                 | 5                     |
| Total       | Total                                 | 82                    |

1. Prado-Martinez J, Sudmant PH, Kidd JM, Li H, Kelley JL, Lorente-Galdos B, et al. Great ape genetic diversity and population history. *Nature*. 2013;499: 471–5. doi:10.1038/nature12228
