# Supplementary material for: Functional Implications of Human-Specific Changes in Great Ape microRNAs
Source: PubMed Central journal article supplement (PMC4841587; doi:10.1371/journal.pone.0154194), 2016-04-22
Supplement: pone.0154194.s003.pdf [file pone.0154194.s003.pdf]

**S2 Table. Primers used for miRNA cloning and qPCR expression analysis.**

| miRNA                                         | Primer sequence                        | Amplified fragment size | Use           |
|-----------------------------------------------|----------------------------------------|-------------------------|---------------|
| mir-299                                       | Fw: ACACACACCTCGAGAGTTCTGCCTTGGGAAATCG | 489 bp <sup>a</sup>     | miRNA cloning |
|                                               | Rv: ACACACACGGATCCTGTTTGGCACTGAGGAGAAG |                         |               |
| mir-541                                       | Fw: ACACACACCTCGAGGTTCCACTCCTGCTGACTCC | 554 bp <sup>a</sup>     | miRNA cloning |
|                                               | Rv: ACACACACGGATCCTATCAACAGCTGGCTGACCA |                         |               |
| mir-508                                       | Fw: ACACACACGGATCCGCATGCCTCCTTTGGACAAG | 511 bp <sup>a</sup>     | miRNA cloning |
|                                               | Rv: ACACACACCTCGAGATTTGTTGCCACTGAAGAGA |                         |               |
| mir-503                                       | Fw: ACACACACGGATCCGGGGTGCCAAAATGAAGCAT | 395 bp <sup>a</sup>     | miRNA cloning |
|                                               | Rv: ACACACACCTCGAGGCTCGCGTCTCTGTTTCC   |                         |               |
| mir-938                                       | Fw: CACACACAAGATCTCCAATCATTCTGGCAGTGA  | 549 bp <sup>a</sup>     | miRNA cloning |
|                                               | Rv: CACACACACTGCAGTTCATTGCTTGTGGGATCA  |                         |               |
| hsa-miR-299-3p                                | Fw: AGTATGTGGGA <b>T</b> GGTAAACC      | 46 bp                   | qPCR analyses |
|                                               | Rv: GGTCCAGTTTTTTTTTTTTTTTAAGC         |                         |               |
| ptr-miR-299-3p                                | Fw: GTATGTGGGA <b>C</b> GGTAAACC       | 45 bp                   | qPCR analyses |
|                                               | Rv: GGTCCAGTTTTTTTTTTTTTTTAAGC         |                         |               |
| hsa-miR-503-3p                                | Fw: CGCAGGG <b>G</b> GTATTGTTTC        | 44 bp                   | qPCR analyses |
|                                               | Rv: GTTTTTTTTTTTTTTTCTGGCA             |                         |               |
| ptr miR-503-3p                                | Fw: CGCAGGG <b>A</b> GTATTGTTTC        | 44 bp                   | qPCR analyses |
|                                               | Rv: GTTTTTTTTTTTTTTTCTGGCA             |                         |               |
| hsa-miR-508-3p                                | Fw: CAGTGATTGTAGCCTTTT <b>G</b> GA     | 48 bp                   | qPCR analyses |
|                                               | Rv: AGGTCCAGTTTTTTTTTTTTTTTCTAC        |                         |               |
| ptr-miR-508-3p                                | Fw: GCAGTGATTGTAGCCTTTT <b>T</b> GA    | 49 bp                   | qPCR analyses |
|                                               | Rv: AGGTCCAGTTTTTTTTTTTTTTTCTAC        |                         |               |
| hsa-miR-541-3p<br>mml-miR-541-3p <sup>b</sup> | Fw: CAGTGGTGGGCACAGA                   | 46 bp                   | qPCR analyses |
|                                               | Rv: GTCCAGTTTTTTTTTTTTTTTAGTCC         |                         |               |
| hsa-miR-938-5p                                | Fw: CAGTGCCCTTAAAGGTGA                 | 43 bp                   | qPCR analyses |
|                                               | Rv: CAGTTTTTTTTTTTTTTTACTGGGT          |                         |               |

Nucleotides shown in bold letters indicate the difference between the human and non-human miRNA variants. <sup>a</sup>The cloning fragment size includes the precursor miRNA sequence plus 120-300 bp at both extremes and primers tail recognized by the restriction enzyme. <sup>b</sup>Non-human variants were chimpanzee miRNA sequences, except miR-541-3p, for which we used the macaque sequence due to the pre-miRNA has not been described in chimpanzee. Same primers were used for human and macaque miR-541-3p qPCR amplification since they did not match the nucleotide substitution between both variants.
