# Supplementary material for: Functional Implications of Human-Specific Changes in Great Ape microRNAs
Source: PubMed Central journal article supplement (PMC4841587; doi:10.1371/journal.pone.0154194), 2016-04-22
Supplement: pone.0154194.s004.pdf [file pone.0154194.s004.pdf]

**S3 Table. Conservation among miRNA regions.** Top right in grey: p-values for the generalized linear model used to compare conservation among different miRNA regions. The model takes into account GC content: SNV density ~ GC content + miRNA region. Bottom left in white: p-values for the paired t-test comparing concatenated nucleotide diversity values of each miRNA region. Asterisks indicate p-value < 0.05.

|                 | Flanking 3' | Flanking 5' | Precursor miRNA | Mature miRNA | Seed region |
|-----------------|-------------|-------------|-----------------|--------------|-------------|
| Flanking 3'     |             | 0.678809    | 0.029605*       | 2.75E-05*    | 0.000151*   |
| Flanking 5'     | 0.08245     |             | 0.00845*        | 4.36E-06*    | 2.79E-05*   |
| Precursor miRNA | 8.892E-05*  | 8.979E-08*  |                 | 0.00867*     | 0.030776*   |
| Mature miRNA    | 1.331E-07*  | 6.64E-07*   | 0.005981*       |              | 0.69483     |
| Seed region     | 6.203E-05*  | 1.149E-06*  | 0.007482*       | 0.5417       |             |
