# Supplementary material for: Functional Implications of Human-Specific Changes in Great Ape microRNAs
Source: PubMed Central journal article supplement (PMC4841587; doi:10.1371/journal.pone.0154194), 2016-04-22
Supplement: pone.0154194.s006.pdf [file pone.0154194.s006.pdf]

**S5 Table. Minimum free energy values (MFE).** MFE values in kcal/mol of the secondary structures predicted for the four studied miRNAs according to RNAfold.

|         | MFE human variant | MFE non-human variant | MFE non-human variant only considering nucleotide substitutions in 3p strand |
|---------|-------------------|-----------------------|------------------------------------------------------------------------------|
| mir-299 | -40.4             | -42.9                 | -42.2                                                                        |
| mir-503 | -42.2             | -41.4                 | -42.2                                                                        |
| mir-508 | -49.2             | -39.1                 | -42.6                                                                        |
| mir-541 | -29.6             | -31.2                 | -31.5                                                                        |
