# Supplementary material for: Functional Implications of Human-Specific Changes in Great Ape microRNAs
Source: PubMed Central journal article supplement (PMC4841587; doi:10.1371/journal.pone.0154194), 2016-04-22
Supplement: pone.0154194.s007.pdf [file pone.0154194.s007.pdf]

**Table S6. Top significant pathways and networks associated with genes exclusively deregulated by the human or the non-human miRNAs.** Data based on the Ingenuity Pathway Analysis software.

|            | Top 5 canonical pathways | Top 5 networks                                                                                                                                                                                                      |                                                                                                                                                                                                                                                                                                                                                                                                                                                             |
|------------|--------------------------|---------------------------------------------------------------------------------------------------------------------------------------------------------------------------------------------------------------------|-------------------------------------------------------------------------------------------------------------------------------------------------------------------------------------------------------------------------------------------------------------------------------------------------------------------------------------------------------------------------------------------------------------------------------------------------------------|
| miR-299-3p | Human                    | <p>RAN Signaling</p> <p>Estrogen-mediated S-phase Entry</p> <p>Ethanol Degradation IV</p> <p>Antiproliferative Role of TOB in T Cell Signaling</p> <p>Remodeling of Epithelial Adherens Junctions</p>               | <p>Carbohydrate Metabolism, Hereditary Disorder, Lipid Metabolism</p> <p>Carbohydrate Metabolism, Small Molecule Biochemistry, Cell Cycle</p> <p>Cell Morphology, Cellular Compromise, Developmental Disorder</p> <p>RNA Post-Transcriptional Modification, Small Molecule Biochemistry, Hereditary Disorder</p> <p>Cellular Assembly and Organization, Cardiovascular Disease, Cardiovascular System Development and Function</p>                          |
|            | Non-human                | <p>RAN Signaling</p> <p>Estrogen-mediated S-phase Entry</p> <p>Protein Ubiquitination Pathway</p> <p>Mitochondrial Dysfunction</p> <p>Aryl Hydrocarbon Receptor Signaling</p>                                       | <p>Hereditary Disorder, Metabolic Disease, Developmental Disorder</p> <p>Connective Tissue Disorders, Developmental Disorder, Hereditary Disorder</p> <p>RNA Post-Transcriptional Modification, Infectious Disease, Cardiovascular System Development and Function</p> <p>RNA Post-Transcriptional Modification, Developmental Disorder, Hereditary Disorder</p> <p>Cellular Assembly and Organization, Nervous System Development and Function, Cancer</p> |
| miR-503-3p | Human                    | <p>Melanoma Signaling</p> <p>ERK/MAPK Signaling</p> <p>Breast Cancer Regulation by Stathmin1</p> <p>Regulation of Cellular Mechanics by Calpain Protease</p> <p>Antiproliferative Role of Somatostatin Receptor</p> | <p>Cell Cycle, Small Molecule Biochemistry, Cell-mediated Immune Response</p> <p>Digestive System Development and Function, Hepatic System Development and Function, Organ Development</p> <p>Post-Translational Modification, Cell Signaling, Gene Expression</p>                                                                                                                                                                                          |
|            | Non-human                | <p>Cardiac b-adrenergic Signaling</p> <p>ERK/MAPK Signaling</p> <p>FLT3 Signaling in Hematopoietic Progenitor Cells</p> <p>Ubiquinol-10 Biosynthesis (Eukaryotic)</p> <p>Insulin Receptor Signaling</p>             | <p>Cell Morphology, Cellular Compromise, Cellular Assembly and Organization</p> <p>Cell Death and Survival, Cell Morphology, Cellular Assembly and Organization</p> <p>Increased Levels of Albumin, Cellular Assembly and Organization, RNA Post-Transcriptional Modification</p> <p>Cancer, Immunological Disease, Organismal Injury and Abnormalities</p> <p>RNA Post-Transcriptional Modification, Developmental Disorder, Neurological Disease</p>      |

|            |           |                                         |                                                                                                           |
|------------|-----------|-----------------------------------------|-----------------------------------------------------------------------------------------------------------|
| miR-508-3p | Human     | Apoptosis Signaling                     | Cancer, Embryonic Development, Cardiac Regeneration                                                       |
|            |           | PI3K/AKT Signaling                      | Cell Cycle, Cell Morphology, Cellular Function and Maintenance                                            |
|            |           | PEDF Signaling                          | Cellular Movement, Hematological System Development and Function, Immune Cell Trafficking                 |
|            |           | TWEAK Signaling                         | Cellular Assembly and Organization, Cellular Function and Maintenance, Protein Synthesis                  |
|            |           | PTEN Signaling                          | Cancer, Neurological Disease, Cell Morphology                                                             |
|            | Non-human | Apoptosis Signaling                     | Cellular Response to Therapeutics, Connective Tissue Development and Function, Cell Cycle                 |
|            |           | TNFR1 Signaling                         | Molecular Transport, Cellular Assembly and Organization, Tissue Development                               |
|            |           | CD27 Signaling in Lymphocytes           | Cell Death and Survival, Cardiovascular System Development and Function, Organ Morphology                 |
|            |           | TWEAK Signaling                         | Cellular Assembly and Organization, Cellular Function and Maintenance, Cell Morphology                    |
|            |           | PI3K/AKT Signaling                      | Cellular Assembly and Organization, Cellular Function and Maintenance, Cell Cycle                         |
| miR-541-3p | Human     | NRF2-mediated Oxidative Stress Response | Hereditary Disorder, Neurological Disease, Psychological Disorders                                        |
|            |           | PI3K/AKT Signaling                      | Cellular Assembly and Organization, Cell Morphology, Cellular Function and Maintenance                    |
|            |           | Acute Myeloid Leukemia Signaling        | Gene Expression, Gastrointestinal Disease, Cell Death and Survival                                        |
|            |           | Protein Ubiquitination Pathway          | Developmental Disorder, Hereditary Disorder, Metabolic Disease                                            |
|            |           | Estrogen Receptor Signaling             | RNA Post-Transcriptional Modification, Cancer, Tumor Morphology                                           |
|            | Non-human | NRF2-mediated Oxidative Stress Response | Gene Expression, Carbohydrate Metabolism, Developmental Disorder                                          |
|            |           | Protein Ubiquitination Pathway          | Dermatological Diseases and Conditions, Developmental Disorder, Endocrine System Disorders                |
|            |           | Mitochondrial Dysfunction               | Developmental Disorder, Hereditary Disorder, Neurological Disease                                         |
|            |           | Acute Myeloid Leukemia Signaling        | Cellular Development, Cellular Growth and Proliferation, Developmental Disorder                           |
|            |           | Pyridoxal 5'-phosphate Salvage Pathway  | Cell-To-Cell Signaling and Interaction, Hematological System Development and Function, Tissue Development |
